# Supplementary material for: Sickle cell disease in India: a scoping review from a health systems perspective to identify an agenda for research and action
Source: BMJ Glob Health. 2021 Feb 18;6(2):e004322. doi: 10.1136/bmjgh-2020-004322 (PMC7896595; doi:10.1136/bmjgh-2020-004322)
Supplement: Supplementary data [file bmjgh-2020-004322supp003.xlsx]

## Sheet: Sheet1
Title	Assigned to	Type of Literature	Country of Corresponding Author	Qualification of CA	LMIC or non-LMIC (CA)	if non-LMIC, vulnerable focus?	Institution of CA	At least one LMIC author and non-LMIC author	Funding Source	Foreign, Domestic, Mixed funding source	Region under Study	State	Region of India	Level of Care	Method	Notes	Funding Notes
Sickle cell disease: a neglected chronic disease of increasing global health importance	Sangeetha	review	UK	MD	non-LMIC	global HS	University	Y	Gov't	Mixed	Europe & N.America	NA	NA	HS	Review		Wellcome Trust
Global Burden of Sickle Cell Anaemia in Children under Five, 2010–2050: Modelling Based on Demographics, Excess Mortality, and Interventions	Vineet	review	global	PhD	non-LMIC	LMIC focus	University	Y	NGO, Gov't	Domestic	Global	NA	NA	HS	review		Wellcome Trust
Sickle cell disease and pregnancy outcomes: a study of the community-based hospital in a tribal block of Gujarat, India.	Tanya	secondary data review	India	PhD	LMIC		NGO	N	None	Domestic	India	Gujarat	Western	Community Hospital	retrospective		SEWA-Rural
Sickle cell disease in India.	Vineet	review	Jamaica	MBBS	LMIC		University	N	NA	NA	India	NA	NA	Health Systems	review
Haemoglobinopathies in tribal populations of India.	Sangeetha	review	India		LMIC		Medical college	Y	NA	NA	India	NA	NA	Health Systems	review
Effectiveness and Feasibility of Weekly Iron and Folic Acid Supplementation to Adolescent Girls and Boys through Peer Educators at Community Level in the Tribal Area of Gujarat.	Tanya	primary	India	Unknown	LMIC		NGO	N	NGO, Private	Domestic	India	Gujarat	Western	Community	Community based intervention study		Galaxy Surfactants provided financial assistance
Comprehensive integrated care for patients with sickle cell disease in a remote aboriginal tribal population in southern India.	Vineet	primary	USA	MD	LMIC		University	Y	various	Mixed	India	Tamil Nadu	South	ALL	community based program	system, PHC, and secondary hospital level	TN HS grant among other govt/Sangha funding
Situational Analysis of Sickle Cell Disease in Gujarat, India.	Sangeetha	review	India	MD	LMIC		Government Research Institute	Y	NA	NA	India	Gujarat	Western	Community	review
Hydroxyurea in Sickle Cell Disease: Our Experience in Western India.	Vineet	primary	India	MBBS, Junior Resident	LMIC		Medical College	N	likely internal	Domestic	India	Gujarat	Western	Tertiary Hospital	pre/post intervention
Iron deficiency anaemia in sickle cell disorders in India.	Tanya	primary	India	MD	LMIC		Government Research Institute	N	likely internal	Domestic	India	MH, GJ, TN, OS	Multiple	Tertiary Hospital	one time descriptive study
Attrition from Care and Clinical Outcomes in a Cohort of Sickle Cell Disease Patients in a Tribal Area of Western India.	Vineet	primary	India	MPH	LMIC		NGO	N	Gov't, NGO, Private		India	Orissa	Central	Community	longitudinal descriptive study
Prenatal diagnosis of sickle syndromes in India: dilemmas in counselling.	Sangeetha	primary	India	PhD	LMIC		Government Research Institute	Y	ICMR	Domestic	India	Maharasthra	Western	Tertiary Hospital	cross-sectional descriptive
Clinical profile of sickle cell disease in Orissa.	Sangeetha	primary	India	MD	LMIC		Academic Medical Center	Y	Not Reported	NA	India	Orissa	Central	Tertiary Hospital	prospective cohort
Neonatal Screening and the Clinical Outcome in Children with Sickle Cell Disease in Central India.	Sangeetha	primary	India	PhD	LMIC		Government Research Institute	Y	DBT, Gov't	Mixed	India	East Maharasthra (Nagpur)	Central	Tertiary Hospital	prospective cohort
Effective control of sickle cell disease with hydroxyurea therapy.	Sangeetha	primary	India	MD	LMIC		Academic Medical Center	Y	Unknown	Likely Domestic	India	Chhattisgarh	Central	Tertiary Hospital	pre-post intervetion
Haemoglobinopathies in India: estimates of blood requirements and treatment costs for the decade 2017-2026.	Vineet	secondary	India	PhD	LMIC		NGO	Y	Gov't	Domestic	India	ALL	ALL	HS	secondary review
Implementation of Indigenous Electronic Medical Record System to Facilitate Care of Sickle Cell Disease Patients in Chhattisgarh.	Prashanth	primary	India	?	LMIC		Academic Medical Center	N	Gov't	Domestic	India	Chhattisgarh	Central	HS	implementation
Screening for the sickle cell gene in Gujarat, India: a village-based model.	Vineet	primary	India	MD	LMIC		NGO	N	Unknown	NA	India	Gujarat	Western	Community	implementation	LMIC-LMIC collaboration	NGO?
Feasibility of a newborn screening and follow-up programme for sickle cell disease among South Gujarat (India) tribal populations.	Tanya	primary	India	MBBS	LMIC		Government Research Institute	Y	Gov't	Domestic	India	Gujarat	Western	Tertiary Hospital	implementation
Initial outcomes of a comprehensive care model for sickle cell disease among a tribal population in rural western India	Vineet	primary	India	MD	LMIC		NGO	Y	Gov't, Private	Domestic	India	Gujarat	Western	Community	implementation
Newborn screening for sickle cell disease: Indian experience	Sangeetha	review	India	PhD	LMIC		Government Research Institute		NA	NA	India	NA	NA	HS	Review
Comprehensive care for sickle cell disease immigrant patients: a reproducible model achieving high adherence to minimum standards of care.	Vineet	primary	Italy	MD	non-LMIC	children, immigrants	University	N	NGO	Domestic	Italy	NA	NA	Tertiary Hospital	retrospective cohort		City of Hope Foundation, Italy
A global perspective on sickle cell disease.	Prashanth	review	USA	MD	non-LMIC	LMIC focus	Academic Medical Center		None	NA	LMIC	NA	NA	HS	Review
Quality-of-care indicators for children with sickle cell disease	Vineet	primary	USA	MD	non-LMIC	children	University	N	Private	Domestic	USA	NA	NA	Tertiary Hospital	Rand/University of California Los Angeles appropriateness method		Novartis Pharmaceuticals Corp
Time to apply a social determinants of health lens to addressing sickle cell disorders in sub-Saharan Africa.		review	Africa	PhD	LMIC		University	Y	None	NA	Africa	NA	NA	HS	Review
The spatial epidemiology of sickle-cell anaemia in India		primary	Australia	PhD	LMIC		Research Institute	Y	Unknown	NA	India	ALL	ALL	NA	Linear Regression
Effective use of hydroxyurea for sickle cell anemia in low-resource countries		review	USA	MD	LMIC		Academic Medical Center	N	Unknown	NA	Caribbean, Africa	NA	NA	HS	Review
The Sickle Cell Anemia health problems Traditional and Modern treatment practices among the Soliga tribes at B.R.Hills, South India		primary	India	PhD	LMIC		Research Institute	Y	Unknown	NA	India	Karnataka	South	Community/HS	Structured Interview
Exploring Ayurvedic Knowledge on Food and Health for Providing Innovative Solutions to Contemporary Healthcare		review	India	PhD	LMIC		University	Y	Unknown	NA	India	ALL	NA	HS	Review
Quality of care in sickle cell disease: Cross-sectional study and development of a measure for adults reporting on ambulatory and emergency department care		primary	USA	MS	non-LMIC	adult SCD patients	Academic Medical Center	N	Gov't	Domestic	USA	NA	NA	HS	Focus group
Sickle cell disease in Africa: an overview of the integrated approach to health, research, education and advocacy in Tanzania, 2004-2016		review	Tanzania	MD	LMIC		Academic Medical Center	Y	NGO	Foreign	Tanzania	NA	NA	HS	Review		DBT
Prevention and Control of Hemoglobinopathies in India - Thalassemias, Sickle Cell Disease and Other Variant Hemoglobins		grey literature	India	NA	LMIC		Gov't	Y	Gov't	Domestic	India	ALL	ALL	HS	Gov't Report
Policy for Prevention and Control of Hemoglobinopathies — Thalassemia, Sickle Cell Disease and variant Hemoglobins in India		grey literature	India	NA	LMIC		Gov't		Gov't	Domestic	india	ALL	ALL	HS	Gov't Draft Policy
